# Supplementary material for: Genetic regulation of mitotic competence in G0 quiescent cells
Source: PubMed Central journal article supplement — Sci Adv. 2018 Aug 15;4(8):eaat5685. doi: 10.1126/sciadv.aat5685 (PMC6093628; doi:10.1126/sciadv.aat5685), 2018-08-15
Supplement: aat5685_SM.pdf [file aat5685_SM.pdf]

## Supplementary Materials for

### Genetic regulation of mitotic competence in G<sub>0</sub> quiescent cells

Kenichi Sajiki\*, Yuria Tahara, Lisa Uehara, Toshio Sasaki, Tomáš Pluskal, Mitsuhiro Yanagida\*

\*Corresponding author. Email: [sajiki@oist.jp](mailto:sajiki@oist.jp) (K.S.); [myanagid@gmail.com](mailto:myanagid@gmail.com) (M.Y.)

Published 15 August 2018, *Sci. Adv.* **4**, eaat5685 (2018)

DOI: 10.1126/sciadv.aat5685

#### The PDF file includes:

Fig. S1. Fluorescence images of nitric oxide (green, DAF-FM DA) and vacuoles (red, FM4-64) and merged images of indicated strains.

Fig. S2. A low-mobility band of Ned1-FLAG is phosphorylated.

Fig. S3. Electron micrograph of  $\Delta SPBC902.03$  at 24 hours after -N.

Fig. S4. *ned1-264* showed MC loss and deformed nuclei, which were rescued by deletions of autophagy genes.

Fig. S5. Scheme of two screening procedures.

Fig. S6. PCR confirmation of gene deletion.

Legends for tables S1 to S3

#### Other Supplementary Material for this manuscript includes the following:

(available at [advances.sciencemag.org/cgi/content/full/4/8/eaat5685/DC1](http://advances.sciencemag.org/cgi/content/full/4/8/eaat5685/DC1))

Table S1 (Microsoft Excel format). Table of 85 GZE genes.

Table S2 (Microsoft Excel format). List of cancer-related references for 85 GZE genes.

Table S3 (Microsoft Excel format). Strains that failed to backcross or grow.

Fig. S1

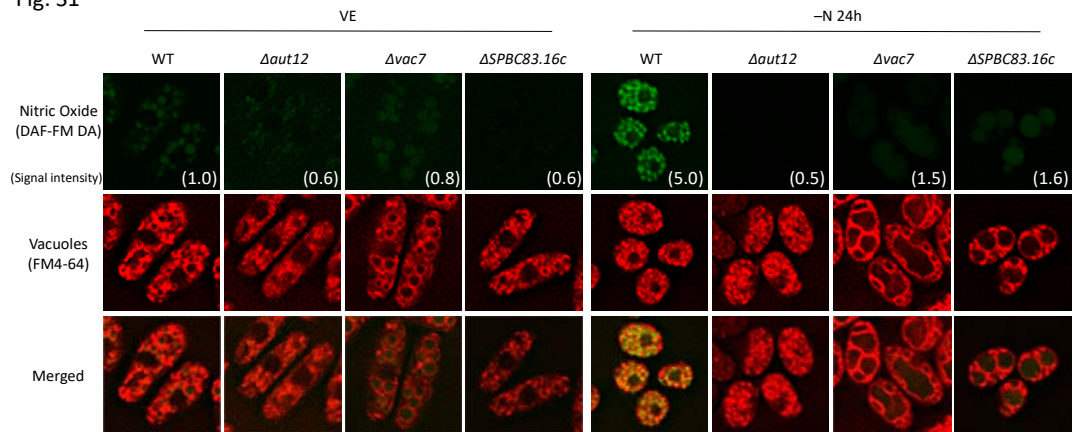

**Fig. S1. Fluorescence images of nitric oxide (green, DAF-FM DA) and vacuoles (red, FM4-64) and merged images of indicated strains.** Left columns show VE cells, and right columns show cells 24 hours after -N. Signal intensity of DAF-FM DA was quantified and shown in the images, proportional to WT VE cells.

Fig. S2

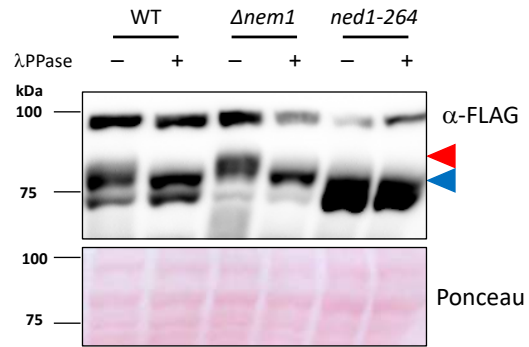

**Fig. S2. A low-mobility band of Ned1-FLAG is phosphorylated.** Western blot analysis of Ned1-FLAG-tagged strains of WT,  $\Delta nem1$  and  $ned1-264$  was performed in a 6% Phos-tag gel. Samples were prepared from VE cells, treated with (+) or without (–) lambda protein phosphatase ( $\lambda$ PPase). A low-mobility band (red arrowhead) increased its electrophoretic mobility (blue arrowhead) after  $\lambda$ PPase treatment.

Fig. S3

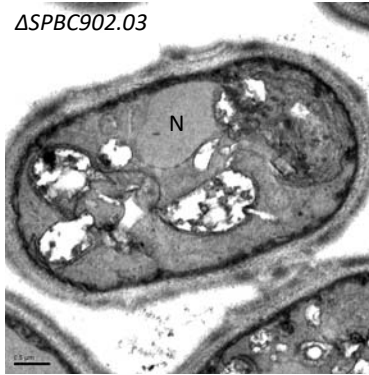

**Fig. S3. Electron micrograph of *ΔSPBC902.03* at 24 hours after -N. N, nucleus.**

Fig. S4

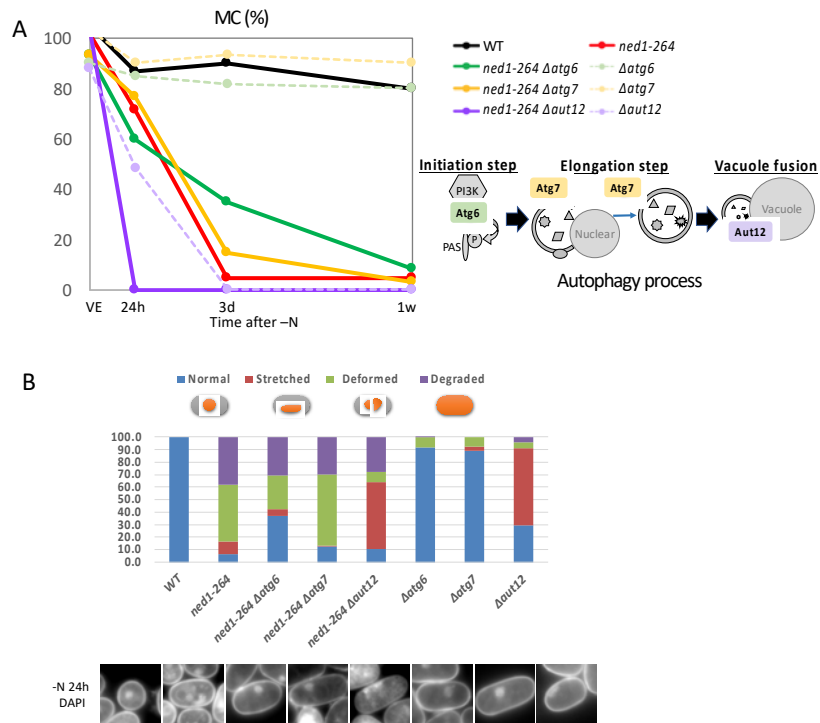

**Fig. S4. *ned1-264* showed MC loss and deformed nuclei, which were rescued by deletions of autophagy genes. (A) MC graphs of the indicated strains. Diagram showing autophagy processes associated with these strains. (B) Percentages of DAPI-stained nuclear shapes found in indicated strains and DAPI images 24 hours after -N. 200 cells for each strain were counted.**

Fig. S5

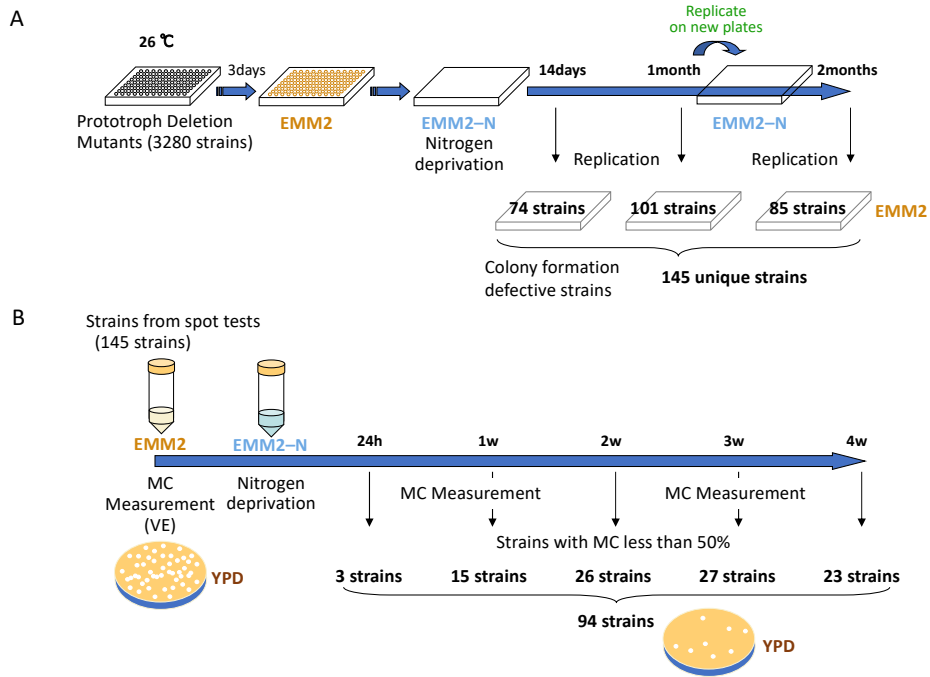

**Fig. S5. Scheme of two screening procedures.** (A) Spot tests of 3280 prototrophic deletion strains. Colony formation ability was tested after -N on agar plates for a maximum of 2 months. (B) MC measurements of selected strains from spot tests. MC was measured after -N using liquid medium for a maximum of 4 weeks.

Fig. S6

A 5' end check  
cp5 – CPN1

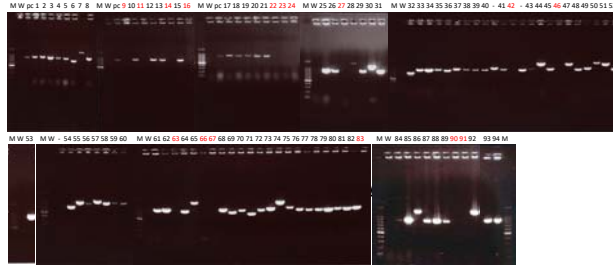

cp5 – CPN1

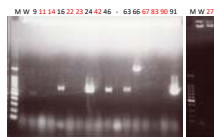

| PCR No. | Gene ID      | Gene Name    | PCR No. | Gene ID         | Gene Name    | PCR No. | Gene ID      | Gene Name   | PCR No. | Gene ID        | Gene Name     |
|---------|--------------|--------------|---------|-----------------|--------------|---------|--------------|-------------|---------|----------------|---------------|
| 1       | SPAC10F6.16  | msg134       | 25      | SPAC13G5.04     | lys2         | 49      | SPBC18E5.04  | rgt1001     | 73      | SPBC647.15c    | ndc1          |
| 2       | SPAC11D3.15  | SPAC11D3.15  | 26      | SPAC3A12.13c    | hxt1         | 50      | SPBC19H10.01 | vac4        | 74      | SPBC687.13     | vac7          |
| 3       | SPAC11H11.01 | ssg1         | 27      | SPAC3E10.17     | hvt1         | 51      | SPBC215.14c  | vps20       | 75      | SPBC687.16c    | dap2          |
| 4       | SPAC144.02   | scf1         | 28      | SPAC4F10.04     | yca1         | 52      | SPBC21C3.02c | dep1        | 76      | SPCC11E10.06c  | epd4          |
| 5       | SPAC144.06c  | spc1         | 29      | SPAC4F10.07c    | spg13        | 53      | SPBC12C3.03  | SPBC12C3.03 | 77      | SPCC11E10.08   | rk1           |
| 6       | SPAC148B.01  | spc2         | 30      | SPAC4F8.01      | dtd4         | 54      | SPBC21D16.16 | mhf1        | 78      | SPCC1393.08    | SPCC1393.08   |
| 7       | SPAC17A5.14  | exo2         | 31      | SPAC4G9.13c     | vps26        | 55      | SPBC23G2.03c | hst1        | 79      | SPCC1612.06c   | asp1          |
| 8       | SPAC17G8.06c | hst1         | 32      | SPAC47A15.14    | spg11        | 56      | SPBC365.16   | SPBC365.16  | 80      | SPCC16C4.20c   | hsc2          |
| 9       | SPAC17G8.05  | mes20        | 33      | SPAC47A12       | ssr1         | 57      | SPBC388.10c  | nem1        | 81      | SPCC1739.07    | chl1          |
| 10      | SPAC17G8.06c | SPAC17G8.06c | 34      | SPAC48B.02      | spg18        | 58      | SPBC389.06c  | als3        | 82      | SPCC188.02     | par1          |
| 11      | SPAC18G2.08c | SPAC18G2.08c | 35      | SPAC49.05       | hsp7         | 59      | SPBC389.11c  | chl1        | 83      | SPCC248H10.06  | SPCC248H10.06 |
| 12      | SPAC183.16c  | vht1         | 36      | SPAC49.09       | SPAC49.09    | 60      | SPBC389.13c  | ppg102      | 84      | SPCC248H10.11c | hsp7          |
| 13      | SPAC184.03c  | aur12        | 37      | SPAC49.04c      | SPAC49.04c   | 61      | SPBC428.04   | spg12       | 85      | SPCC264.05     | vps3          |
| 14      | SPAC184.02c  | shu1         | 38      | SPAC49.11.02c   | dph3         | 62      | SPBC428.10c  | atg5        | 86      | SPCC263.04c    | occp          |
| 15      | SPAC20G8.10c | atg6         | 39      | SPAC49.13c      | zwf16        | 63      | SPBC446.06   | ket1        | 87      | SPCC262.12c    | gph1          |
| 16      | SPAC22F8.12c | spg1         | 40      | SPAC49.14.01.14 | spg15        | 64      | SPBC462.11   | meb6        | 88      | SPCC263.14c    | tpg63         |
| 17      | SPAC22H12.02 | flg3         | 41      | SPAP4691.02     | SPAP4691.02  | 65      | SPBC477.04   | SPBC477.04  | 89      | SPCC274.02c    | pen1          |
| 18      | SPAC23D3.09  | spg2         | 42      | SPBC1347.08c    | SPBC1347.08c | 66      | SPBC484.13   | spg23       | 90      | SPCC283.09     | mgp4          |
| 19      | SPAC23A8.01c | hls          | 43      | SPBC13G1.09c    | als3         | 67      | SPBC484.15c  | spg16       | 91      | SPCC172.09c    | rcf1          |
| 20      | SPAC23A8.02  | atg14        | 44      | SPBC13G1.12     | dtd2         | 68      | SPBC481.05c  | atg7        | 92      | SPCC177.13     | vps35         |
| 21      | SPAC23A3.04  | rgp2002      | 45      | SPBC16B.01      | pmg1         | 69      | SPBC725.01   | SPBC725.01  | 93      | SPCC270.05     | rgp561        |
| 22      | SPAC23A3.07c | rgp1101      | 46      | SPBC16G8.11     | us3201       | 70      | SPBC83.16c   | SPBC83.16c  | 94      | SPCPIE11.05c   | are2          |
| 23      | SPAC23A4.18  | prn1         | 47      | SPBC1711.04     | msd1         | 71      | SPBC83.19c   | SPBC83.19c  |         |                |               |
| 24      | SPAC31F12.01 | zst1         | 48      | SPBC1718.03     | ket1         | 72      | SPBC902.03   | SPBC902.03  |         |                |               |

B 3' end check  
cp3 – CPC3

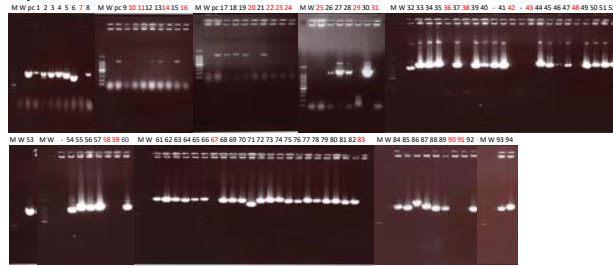

cp3 – CPC1

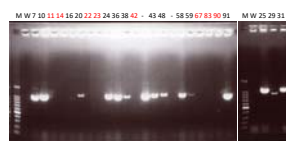

| PCR No. | Gene ID       | Gene Name    | PCR No. | Gene ID      | Gene Name    | PCR No. | Gene ID        | Gene Name     |
|---------|---------------|--------------|---------|--------------|--------------|---------|----------------|---------------|
| 1       | SPAC10F6.16   | msg134       | 33      | SPAC57A7.12  | ssr1         | 65      | SPBC577.04     | SPBC577.04    |
| 2       | SPAC11D3.15   | SPAC11D3.15  | 34      | SPAC58B.07c  | atg1801      | 66      | SPBC586.13     | spg23         |
| 3       | SPAC11H11.01  | ssg1         | 35      | SPAC59.05    | zsp7         | 67      | SPBC648.15c    | spg16         |
| 4       | SPAC144.02    | scf1         | 36      | SPAC59.09    | SPAC59.09    | 68      | SPBC681.05c    | atg7          |
| 5       | SPAC144.06c   | spc1         | 37      | SPAC59M.04c  | SPAC59M.04c  | 69      | SPBC725.01     | SPBC725.01    |
| 6       | SPAC148B.01   | spc2         | 38      | SPAC6E11.02c | spg3         | 70      | SPBC81.19c     | SPBC81.19c    |
| 7       | SPAC17A5.14   | exo2         | 39      | SPAC9.13c    | zwf16        | 71      | SPBC83.19c     | SPBC83.19c    |
| 8       | SPAC17G8.06c  | hst1         | 40      | SPAP1A10.14  | spg15        | 72      | SPBC92.03      | SPBC92.03     |
| 9       | SPAC17G8.05   | mes20        | 41      | SPAP4691.02  | SPAP4691.02  | 73      | SPBC47.15c     | msg1          |
| 10      | SPAC17G8.06c  | SPAC17G8.06c | 42      | SPBC1347.08c | SPBC1347.08c | 74      | SPBC687.13     | vac7          |
| 11      | SPAC18G2.08c  | SPAC18G2.08c | 43      | SPBC13G1.09c | als3         | 75      | SPBC687.16c    | dap2          |
| 12      | SPAC183.16c   | vht1         | 44      | SPBC13G1.12  | dtd2         | 76      | SPCC11E10.06c  | sp4           |
| 13      | SPAC184.03c   | aur12        | 45      | SPBC16B5.01  | pmg1         | 77      | SPCC11E10.08   | rk1           |
| 14      | SPAC184.02c   | shu1         | 46      | SPBC16G8.11  | us3201       | 78      | SPCC1393.08    | SPCC1393.08   |
| 15      | SPAC20G8.10c  | atg6         | 47      | SPBC1711.04  | msd1         | 79      | SPCC1672.06c   | asp1          |
| 16      | SPAC22F8.12c  | spg1         | 48      | SPBC1718.03  | ket1         | 80      | SPCC16C4.20c   | hsc2          |
| 17      | SPAC22H12.02  | flg3         | 49      | SPBC18E5.04  | rgt1001      | 81      | SPCC1739.07    | chl1          |
| 18      | SPAC23D3.09   | spg2         | 50      | SPBC18H10.07 | atp2         | 82      | SPCC188.02     | par1          |
| 19      | SPAC23A8.01c  | hls          | 51      | SPBC215.14c  | vps20        | 83      | SPCC248H10.06  | SPCC248H10.06 |
| 20      | SPAC23A8.02   | atg14        | 52      | SPBC21C3.02c | dep1         | 84      | SPCC248H10.11c | hsp7          |
| 21      | SPAC23A3.04   | rgp2002      | 53      | SPBC21C3.03  | SPBC21C3.03  | 85      | SPCC264.05     | vps3          |
| 22      | SPAC23A3.07c  | rgp1101      | 54      | SPBC21D16.16 | mhf1         | 86      | SPCC263.04c    | occp          |
| 23      | SPAC23A4.18   | prn1         | 55      | SPBC22D.03c  | hst1         | 87      | SPCC262.12c    | gph1          |
| 24      | SPAC31F12.01  | zst1         | 56      | SPBC365.16   | SPBC365.16   | 88      | SPCC263.14c    | tpg63         |
| 25      | SPAC31F12.01  | zst1         | 57      | SPBC388.10c  | nem1         | 89      | SPCC274.02c    | pen1          |
| 26      | SPAC31A12.13c | hxt1         | 58      | SPBC389.06c  | als3         | 90      | SPCC274.09     | mgp4          |
| 27      | SPAC3F10.17   | hvt1         | 59      | SPBC389.11c  | chl1         | 91      | SPCC275.09c    | rcf1          |
| 28      | SPAC4E10.04   | spg1         | 60      | SPBC389.13c  | ppg102       | 92      | SPCC177.13     | vps35         |
| 29      | SPAC4F10.07c  | spg13        | 61      | SPBC428.04   | spg12        | 93      | SPCC270.05     | rgp561        |
| 30      | SPAC4F8.01    | dtd4         | 62      | SPBC428.10c  | atg5         | 94      | SPCPIE11.05c   | are2          |
| 31      | SPAC49.13c    | spg15        | 63      | SPBC446.06   | ket1         |         |                |               |
| 32      | SPAC57A15.14  | spg11        | 64      | SPBC462.11   | meb6         |         |                |               |

**Fig. S6. PCR confirmation of gene deletion.** M: Molecular weight DNA ladder. W: wild-type control. pc: positive control. **(A)** Deletion check of the 5' end. Strains that failed to amplify with the first primer set (cp5-CPN10) were also tested with the second primer set (cp5-CPN1). Nine strains (11, 14, 22, 23, 27, 42, 67, 83, 90) failed to amplify with both primer sets, and they were removed from the list. **(B)** Deletion check of the 3' end. Strains that failed to amplify with the first primer set (cp3-CPC3) were also tested with the second primer set (cp3-CPC1). There were eight strains (11, 14, 22, 23, 42, 67, 83, 90) that failed to amplify with both primer sets.



**Table S1. Table of 85 GZE genes.** Columns show classes, functional groups, strain names, human and budding yeast orthologs, MC (%) at the indicated time points, average cell length 24 hours after –N, cell number increment 24 hours after –N and major DNA peaks in VE and 24 hours after –N measured by FACS.

**Table S2. List of cancer-related references for 85 GZE genes.** More than 40% (36 of 85) of these genes are implicated in the etiology of various cancers.

**Table S3. Strains that failed to backcross or grow.** There were 175 unique strains excluded for viability failure (179 strains were listed, but 4 strains were duplicates of other versions), which is about 5% of all 3280 strains.
